# Supplementary material for: Self-assembled super-small AIEgen nanoprobe for highly sensitive and selective detection of protamine and trypsin
Source: Royal Society of Chemistry journal article supplement (doi:10.1039/d3ay00753g), 2023-01-01
Supplement: d3ay00753g1.pdf [file d3ay00753g1.pdf]

Electronic Supplementary Information (ESI) for Analytical Methods.

**Self-assembled super-small AIEgen nanoprobe for highly sensitive  
and selective detection of protamine and trypsin**

Li Zhang,<sup>a</sup> Jiyan Huang,<sup>a</sup> Mixue Chen,<sup>a</sup> Hongmei Huang,<sup>\*a</sup> Yi Xiao,<sup>a</sup> Ronghua Yang,<sup>a</sup>  
Youyu Zhang,<sup>a</sup> Xiaoxiao He,<sup>b</sup> and Kemin Wang<sup>\*b</sup>

<sup>a</sup> *Key Laboratory of Chemical Biology and Traditional Chinese Medicine Research (Ministry of Education), College of Chemistry and Chemical Engineering, Hunan Normal University, Changsha 410081, China*

<sup>b</sup> *State Key Laboratory of Chemo/Biosensing and Chemometrics, College of Chemistry and Chemical Engineering, College of Biology, Hunan University, Changsha 410082, China*

---

\*Corresponding authors.

*E-mail addresses:* huanghongmei@hunnu.edu.cn (H. Huang); kmwang@hnu.edu.cn (K. Wang).

## EXPERIMENTAL SECTION

Typical subunit of Pro:

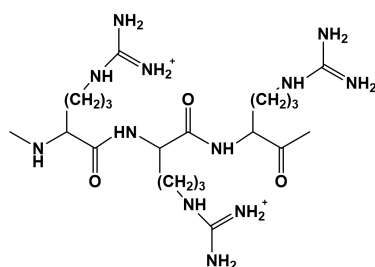

**Calculation of quantum yield:** The quantum yield (QY) of TPE-2Py-SO<sub>3</sub>Na was determined using quinine sulfate (QY = 0.55) in sulfuric acid (0.1 M,  $\eta = 1.33$ ) as the standard. For calculation of quantum yield, five concentrations of each compound were made, all of which had absorbance less than 0.1. The TPE-2Py-SO<sub>3</sub>Na sample was dissolved in HEPES ( $\eta = 1.33$ ), DCM ( $\eta = 1.42$ ) or DMSO ( $\eta = 1.48$ ). Then by comparing the integrated fluorescence intensities (excited at 348 nm) and the absorbency values (at 238 nm, 244 nm or 288 nm) of the TPE-2Py-SO<sub>3</sub>Na sample with the reference of quinine sulfate, QY of the TPE-2Py-SO<sub>3</sub>Na sample was determined. The quantum yield was estimated with the equation:

$$\Phi_x = \Phi_{\text{std}}(F_x A_{\text{std}} \eta_x) / (F_{\text{std}} A_x \eta_{\text{std}})$$

Where  $\Phi$ , F, A, and  $\eta$  are the quantum yield of the standard sample, integrated fluorescence intensity, absorbance, and refractive index, respectively. The subscript “std” refers to the standard fluorophore of known quantum yield, for an example, quinine sulfate used in present work.

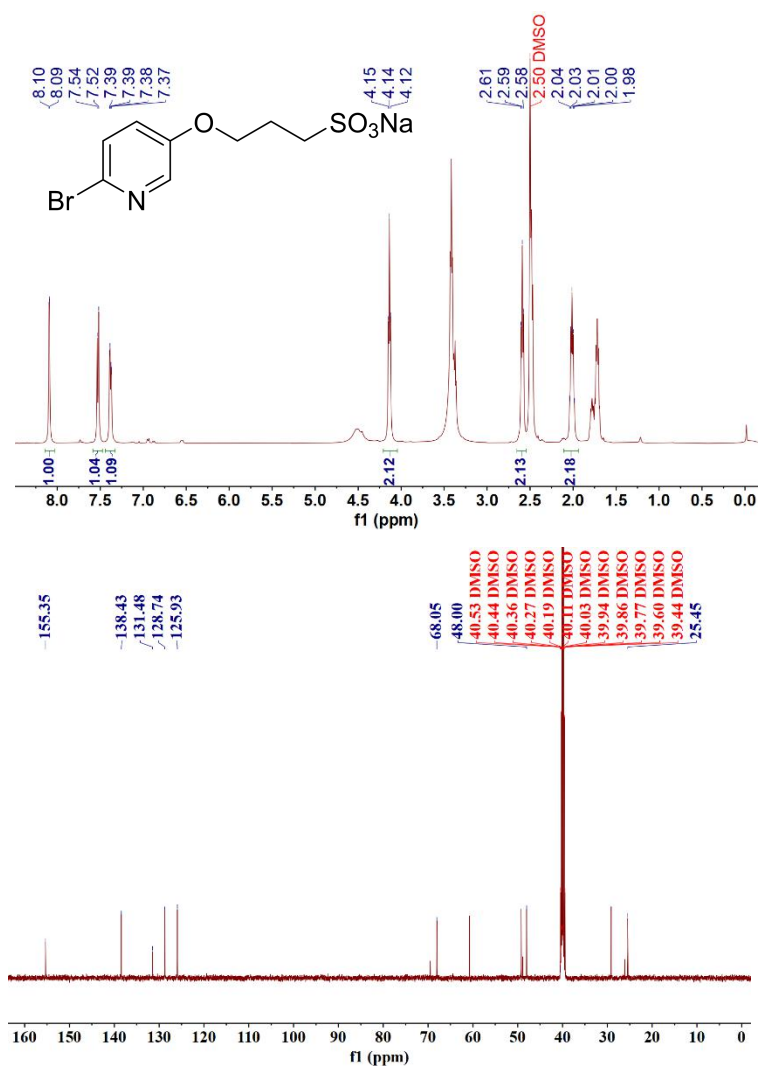

Fig. S1 <sup>1</sup>H NMR and <sup>13</sup>C NMR spectra of compound 1 in DMSO-*d*<sub>6</sub>.

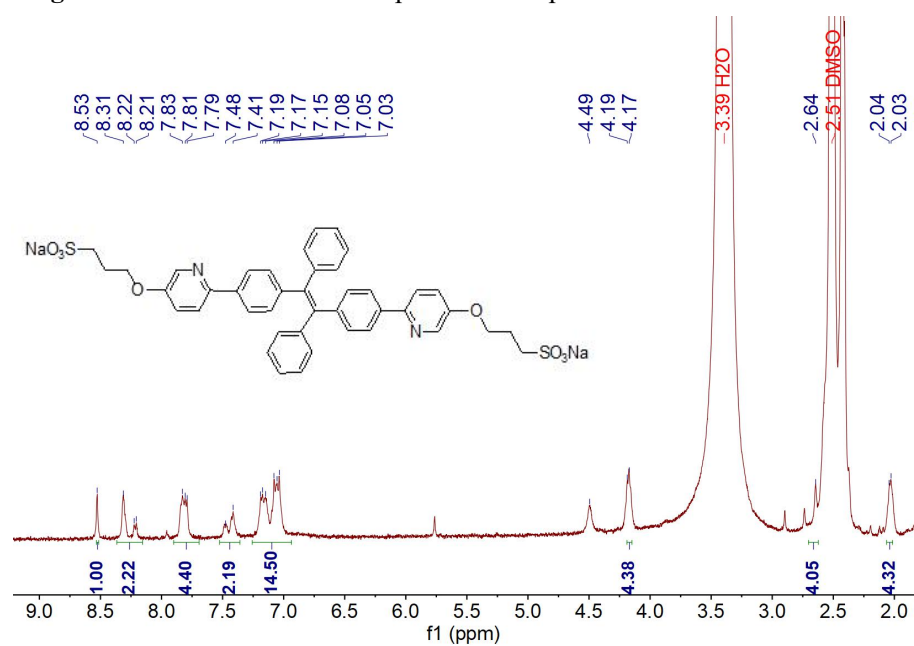

Fig. S2 <sup>1</sup>H NMR spectrum of TPE-2Py-SO<sub>3</sub>Na in DMSO-*d*<sub>6</sub>.

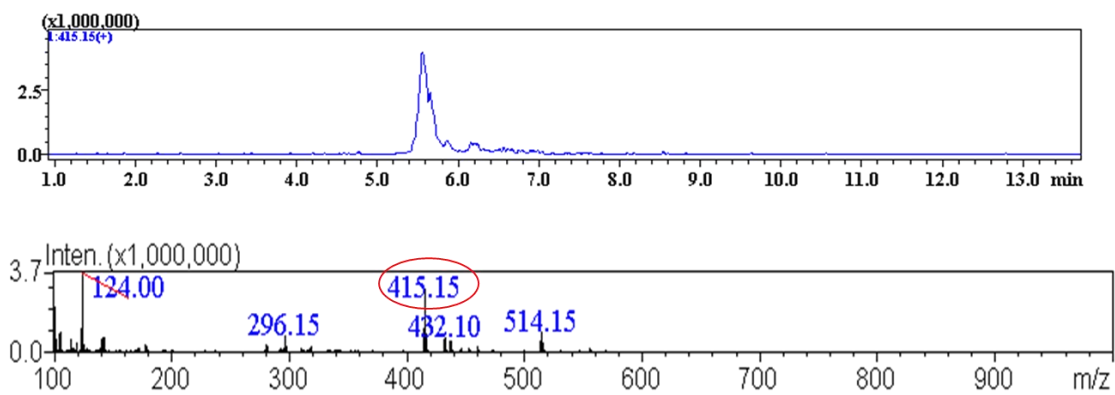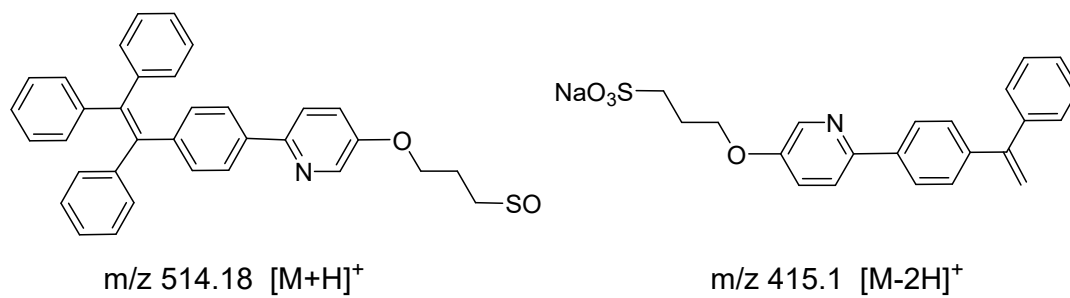

**Fig. S3** LC-MS analyses of TPE-2Py-SO<sub>3</sub>Na.

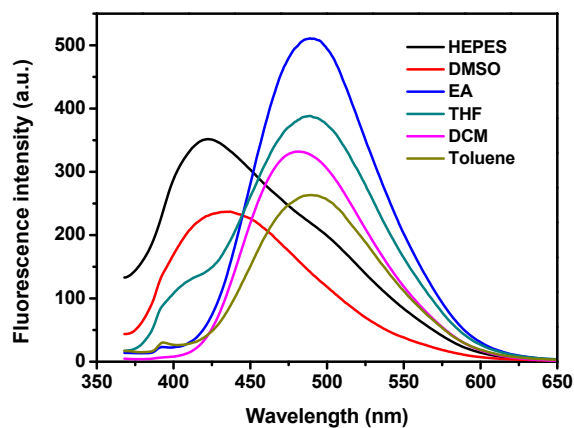

**Fig. S4** Fluorescence emission spectra of TPE-2Py-SO<sub>3</sub>Na in various solvents. Solvent polarity: HEPES > DMSO > EA > THF > DCM > Toluene.

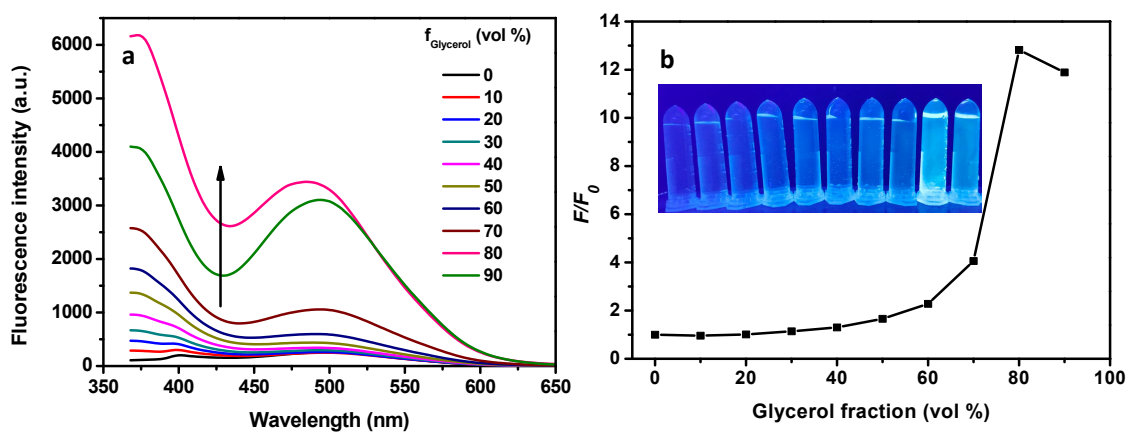

**Fig. S5** (a) Fluorescence emission spectra of TPE-2Py-SO<sub>3</sub>Na (10  $\mu$ M) in different HEPES/glycerol mixtures ( $f_{\text{gly}}$  from 0 to 90%). (b) Plot of  $F/F_0$  versus glycerol fraction in the HEPES/glycerol mixtures. Inset: photographs of TPE-2Py-SO<sub>3</sub>Na in different HEPES/glycerol mixtures taken under 365 nm UV light.

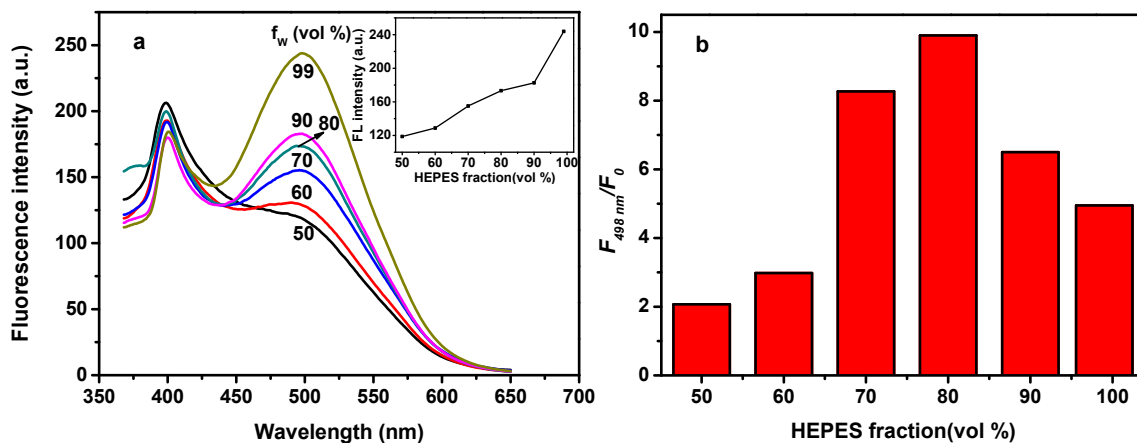

**Fig. S6** (a) Fluorescence emission spectra of TPE-2Py-SO<sub>3</sub>NaNPs in HEPES/DMSO mixtures with different HEPES fractions. (b) Histogram representing fluorescence enhancement of TPE-2Py-SO<sub>3</sub>NaNPs (5.0  $\mu\text{M}$ ) upon addition of Pro ( $8.0 \times 10^{-7}$  g/mL) to HEPES/DMSO with different HEPES fractions.

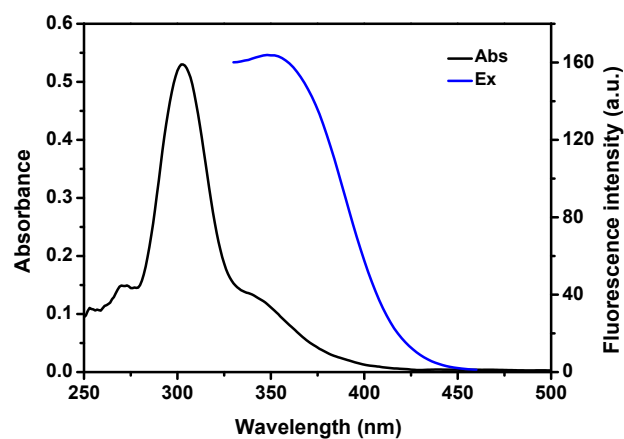

**Fig. S7** UV-vis absorption (left) and fluorescence excitation spectra (right,  $\lambda_{\text{em}} = 498$  nm) of TPE-2Py-SO<sub>3</sub>NaNPs (5.0  $\mu\text{M}$ ) in HEPES/DMSO (pH = 7.4).

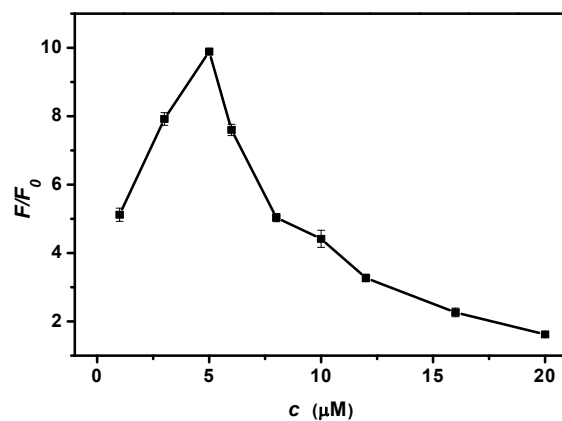

**Fig. S8** The influence of TPE-2Py-SO<sub>3</sub>NaNPs concentration on the fluorescence response to Pro. [Pro] =  $8.0 \times 10^{-7}$  g/mL.  $\lambda_{\text{ex}} = 348$  nm.

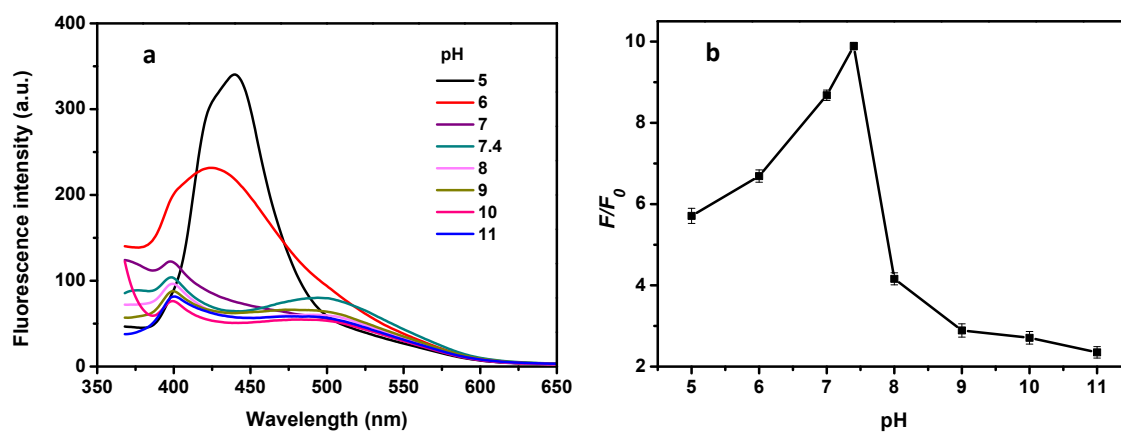

**Fig. S9** (a) The fluorescence emission spectra of TPE-2Py-SO<sub>3</sub>NaNPs (5.0  $\mu\text{M}$ ) in HEPES/DMSO (v/v, 8/2) at different pH. (b) The influence of pH on the fluorescence response efficiency of TPE-2Py-SO<sub>3</sub>NaNPs (5.0  $\mu\text{M}$ ) for Pro ( $8.0 \times 10^{-7}$  g/mL).  $\lambda_{\text{ex}} = 348$  nm.

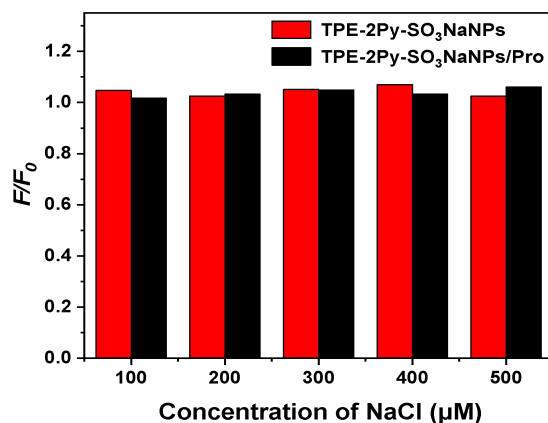

**Fig. S10** The influence of NaCl concentration on the fluorescence response efficiency of TPE-2Py-SO<sub>3</sub>NaNPs and TPE-2Py-SO<sub>3</sub>NaNPs/Pro. [TPE-2Py-SO<sub>3</sub>NaNPs] = 5.0  $\mu\text{M}$ , [Pro] = 8.0  $\times 10^{-7}$  g/mL.

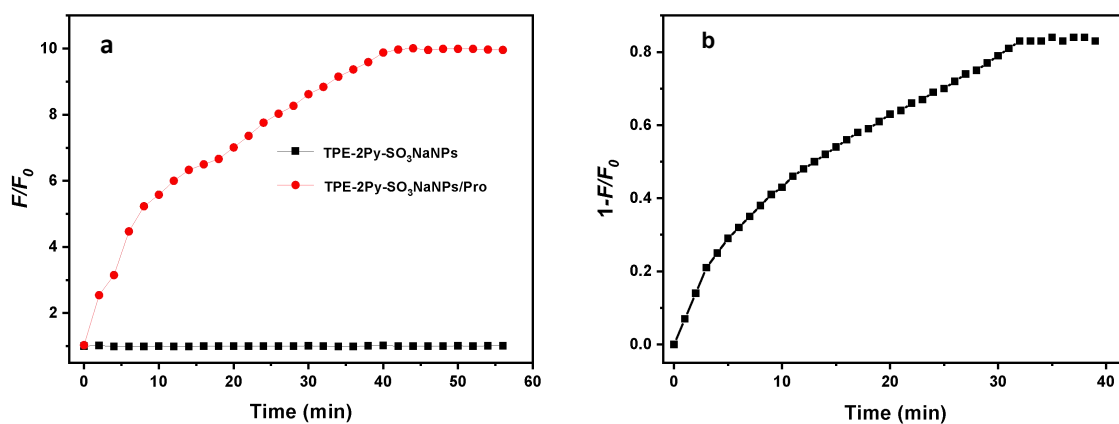

**Fig. S11** (a) The fluorescence intensity variation with time using TPE-2Py-SO<sub>3</sub>NaNPs (5.0  $\mu\text{M}$ ) in the absence and presence of Pro (8.0  $\times 10^{-7}$  g/mL). (b) The fluorescence intensity variation with time for TPE-2Py-SO<sub>3</sub>NaNPs/Pro system in the presence of Try (8.0  $\times 10^{-7}$  g/mL).  $\lambda_{\text{ex}} = 348$  nm.



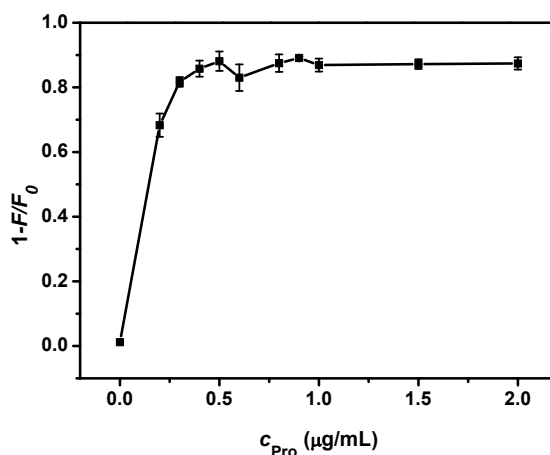

**Fig. S12** The influence of Pro concentration on the fluorescence response towards Try.  $[\text{Try}] = 8.0 \times 10^{-7}$  g/mL. ( $F_0$ : the fluorescence intensity of TPE-2Py-SO<sub>3</sub>NaNPs/Pro;  $F$ : the fluorescence intensity of TPE-2Py-SO<sub>3</sub>NaNPs/ Pro/Try).  $\lambda_{\text{ex}} = 348$  nm.

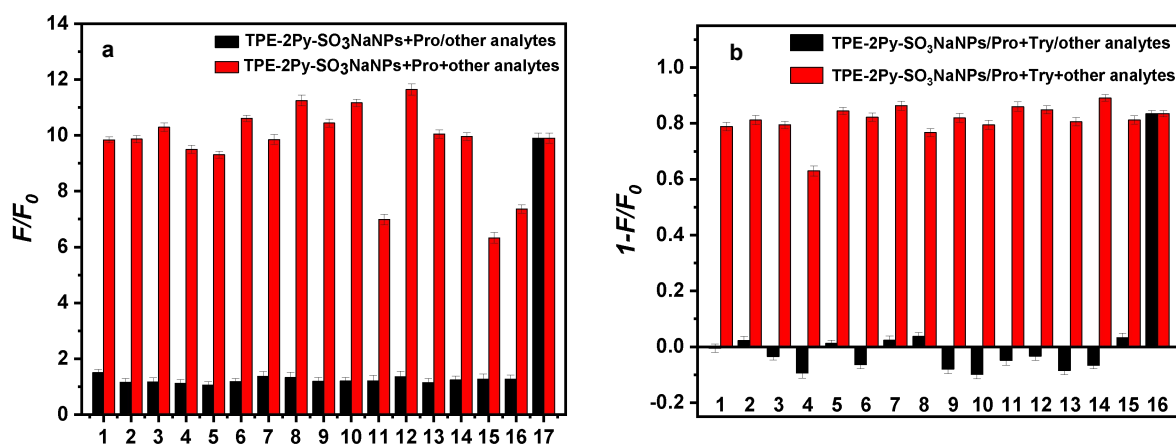

**Fig. S13** (a) Fluorescence response ( $\lambda_{\text{ex}} = 348$  nm) of TPE-2Py-SO<sub>3</sub>NaNPs (5.0  $\mu\text{M}$ ) for Pro ( $8.0 \times 10^{-7}$  g/mL) in the presence of other species. Analyte 1 to 17: GSH, L-Ser, L-Arg, L-Lys, AA, K<sup>+</sup>, Ca<sup>2+</sup>, Mn<sup>2+</sup>, Fe<sup>3+</sup>, Co<sup>2+</sup>, Ni<sup>2+</sup>, D-Glucuronic acid, Urea, Sucrose, Glucose, Lactose and Pro. (b) Fluorescence response of TPE-2Py-SO<sub>3</sub>NaNPs (5.0  $\mu\text{M}$ )/Pro ( $8.0 \times 10^{-7}$  g/mL) for Try ( $8.0 \times 10^{-7}$  g/mL) in the presence of other species ( $4.0 \times 10^{-6}$  g/mL). Analyte 1 to 16: GSH, L-Arg, L-Cys, AA, HCO<sub>3</sub><sup>-</sup>, CH<sub>3</sub>COO<sup>-</sup>, Lauric acid, Sodium tartrate, Glucose, Sucrose, Lactose, Menthol, Urea, ATP, BSA and Try. HEPES/DMSO = 8/2 (v/v), pH = 7.4.

**Table S1**

Comparison of representative probes for Pro assay.

| Material                      | Method          | Linear range   | LOD        | Ref.      |
|-------------------------------|-----------------|----------------|------------|-----------|
| Pt(II) complex <b>1</b>       | Phosphorescence | 0-13.5 µg/mL   | 24.4 ng/mL | [8]       |
| PMTEMA                        | Fluorescence    | 0.1-30 µg/mL   | 0.1 µg/mL  | [12]      |
| PMTEMA                        | Colorimetry     | 1.0-25 µg/mL   | 1.0 µg/mL  | [12]      |
| OFFNPs                        | Fluorescence    | 6.0-750 ng/mL  | 0.5 ng/mL  | [14]      |
| DNA probe                     | Fluorescence    | 2.5-17.5 ng/mL | 2.2 ng/mL  | [15]      |
| TPHA                          | AIE             | 0-6 µg/mL      | 4.78 ng/mL | [24]      |
| DSA-4COOH                     | AIE             | 0.02-0.4 µg/mL | 30 ng/mL   | [25]      |
| TPE-2Py-SO <sub>3</sub> NaNPs | AIE             | 0-1.0 µg/mL    | 8.0 ng/mL  | This work |

**Table S2**

Comparison of representative probes for Try detection.

| Material                          | Method          | Linear range               | LOD        | Ref.      |
|-----------------------------------|-----------------|----------------------------|------------|-----------|
| SiQDs/TSNPRs                      | IFE             | 0-40 ng/mL                 | 8 ng/mL    | [4]       |
| Pt(II) complex <b>1</b>           | Phosphorescence | 0-0.06 µg/mL               | 6.36 ng/mL | [8]       |
| PMTEMA                            | Colorimetry     | -                          | 1.0 µg/mL  | [12]      |
| DNA/protamine                     | Fluorescence    | 62.5-10 <sup>4</sup> ng/mL | 30.2 ng/mL | [15]      |
| UCNP-peptide-AuNP                 | Fluorescence    | 12-208 ng/mL               | 4.15 ng/mL | [18]      |
| AuNCs/CdTe QDs                    | Fluorescence    | 0.02-0.5 µg/mL             | 12 ng/mL   | [19]      |
| PSMA-PhB+TPE/Pro fibers           | Visual image    | -                          | 2 µg/mL    | [27]      |
| Su-TPE/PrS                        | AIE             | 0-384 ng/mL                | 5.28 ng/mL | [28]      |
| TPE-2Py-SO <sub>3</sub> NaNPs/Pro | AIE             | 0-0.8 µg/mL                | 5.0 ng/mL  | This work |
